# Supplementary material for: Computational investigation of charge injection and transport properties of a series of thiophene–pyrrole based oligo-azomethines
Source: Royal Society of Chemistry journal article supplement (doi:10.1039/c3cp55243h), 2014-01-01
Supplement: c3cp55243h1.pdf [file c3cp55243h1.pdf]

## Supporting Information

### Computational Investigation of Charge Injection, and Transport Properties of a Series of Thiophene—pyrrole—based Oligo-azomethines

Harikrishna Sahu and Aditya N. Panda

#### Table of Contents

**Table S1:** IP( $v, a$ )s and EA( $v, a$ )s of all the studied compounds calculated at B3LYP/6-31G(d,p) level of theory.

TABLE S1: IP( $v, a$ )s and EA( $v, a$ )s of all the studied compounds calculated at B3LYP/6-31G(d,p) level of theory. All energies are in eV.

|           |   | 1       | 2       | 3      | 4       | 5       | 6      | 7       | 8       |
|-----------|---|---------|---------|--------|---------|---------|--------|---------|---------|
| IP( $a$ ) | 1 | 6.6183  | 6.5180  | 6.9466 | 6.3213  | 6.2057  | 7.1892 | 6.4701  | 5.9212  |
|           | 2 | 5.7366  | 5.6206  | 6.1559 | 5.6323  | 5.3146  | 6.4641 | 5.4264  | 4.9817  |
|           | 3 | 5.3744  | 5.2433  | 5.8430 | 5.3740  | 4.9509  | 6.1814 | 5.0472  | 4.5858  |
|           | 4 | 5.1848  | 5.0610  | 5.6853 | 5.2497  | 4.7100  | 6.0379 | 4.8139  | 4.3715  |
|           | 5 | 5.0700  | 4.9452  | 5.5893 | 5.1745  | 4.6792  | 5.9471 | 4.6915  | 4.2406  |
| IP( $v$ ) | 1 | 6.8154  | 6.7095  | 7.1759 | 6.5196  | 6.4542  | 7.4067 | 6.6665  | 6.1482  |
|           | 2 | 5.9012  | 5.7887  | 6.3629 | 5.8830  | 5.5653  | 6.6462 | 5.5801  | 5.1499  |
|           | 3 | 5.5190  | 5.3986  | 6.0178 | 5.6145  | 5.1658  | 6.3326 | 5.1809  | 4.7341  |
|           | 4 | 5.3126  | 5.1998  | 5.8328 | 5.4681  | 4.9550  | 6.1588 | 4.9334  | 4.5039  |
|           | 5 | 5.1812  | 5.0644  | 5.7088 | 5.3617  | 4.7962  | 6.0446 | 4.7970  | 4.3590  |
| EA( $a$ ) | 1 | 0.0551  | 0.0514  | 0.4217 | 0.0525  | 0.0187  | 0.7835 | 0.0991  | -0.0475 |
|           | 2 | 1.0262  | 0.9945  | 1.3786 | 0.8227  | 0.9571  | 1.7339 | 0.9892  | 0.7634  |
|           | 3 | 1.4391  | 1.4139  | 1.7617 | 1.1328  | 1.3883  | 2.0955 | 1.3719  | 1.1102  |
|           | 4 | 1.6641  | 1.6150  | 1.9655 | 1.2958  | 1.6546  | 2.2912 | 1.5789  | 1.2999  |
|           | 5 | 1.8045  | 1.7509  | 2.0923 | 1.3984  | 1.6997  | 2.4150 | 1.7089  | 1.4163  |
| EA( $v$ ) | 1 | -0.1224 | -0.1244 | 0.2280 | -0.1303 | -0.1772 | 0.6110 | -0.0876 | -0.2824 |
|           | 2 | 0.8815  | 0.8505  | 1.2043 | 0.6242  | 0.7978  | 1.5658 | 0.8531  | 0.6002  |
|           | 3 | 1.3163  | 1.2615  | 1.6192 | 0.9460  | 1.2118  | 1.9601 | 1.2568  | 0.9742  |
|           | 4 | 1.5566  | 1.5046  | 1.8457 | 1.1266  | 1.4542  | 2.1825 | 1.4794  | 1.1818  |
|           | 5 | 1.7103  | 1.6567  | 1.9963 | 1.2641  | 1.6003  | 2.3247 | 1.6227  | 1.3145  |
